# Supplementary material for: Characteristics and Roles of School Gardens in Urban Areas of Japan: Perspective of School Managers
Source: MDPI journal article supplement (doi:10.3390/land12030565), 2023-02-26
Supplement: s1 [file s1]

Archive with 1 entries (1 files):
- land-2224328-supplementary.pdf
