# Supplementary material for: Characteristics and Roles of School Gardens in Urban Areas of Japan: Perspective of School Managers
Source: MDPI journal article supplement (doi:10.3390/land12030565), 2023-02-26
Supplement: s1 [file s1 › land-2224328-supplementary.pdf]

## Supplementary Material

### Questionnaire survey on the actual situation of agricultural experiences in school farms for elementary school

Please indicate the name and location of your school.

School Name:

Location:

Q1 Where are the agricultural experience held at your school? Please put a "○" in all the numbers that apply. Please follow the instructions below to answer each question.

1. In the school (Please answer in part "I")
2. Farms or farmland near the school (Please answer in part "II")
3. Remote areas away from schools (parks, agricultural experience facilities) (Please answer in part "III")

※In any of the cases 1 to 3 above, please also answer part "IV".

#### Part I Agriculture experiences in the school.

Q2: What facilities do you have for agricultural experience on the school grounds? Please put a "○" in all applicable numbers.

- |                                      |                                        |                                  |
|--------------------------------------|----------------------------------------|----------------------------------|
| 1. Flowerbed (      m <sup>2</sup> ) | 2. Paddy field (      m <sup>2</sup> ) | 3. Field (      m <sup>2</sup> ) |
| 4. Flowerpot                         | 5. Vertical greening                   | 6. Livestock Shelters            |
| 7. Other (      )                    |                                        |                                  |

Q3 What kind of agricultural products are grown at the facilities? Please put a "○" in all applicable numbers.

- |                                                             |
|-------------------------------------------------------------|
| 1. Root crop (radishes, carrots, etc.)                      |
| 2. Fruit vegetables (tomatoes, eggplants, etc.)             |
| 3. Leafy vegetables (lettuce, etc.)                         |
| 4. Cereals (rice, beans, etc.)                              |
| 5. Herbs (shiso, basil, etc.)                               |
| 6. Fruit trees (plum, pear, etc.)                           |
| 7. Trees whose leaves are used (e.g., tea)                  |
| 8. Livestock (animals such as rabbits, sheep, and chickens) |
| 9. Other (      )                                           |

Q4 What is the content of agricultural experience conducted in the facilities in each academic grade? What is the frequency of agricultural experiences? Please check all applicable numbers in the table on the right. Please check all applicable figures in the right table and fill them in the left table by grade.

※Lower grades (1st and 2nd grade) Middle grades (3rd and 4th grade) Upper grades (5th and 6th grade)

| academic grade | Contents<br>(Multiple answers) |
|----------------|--------------------------------|
| lower          |                                |
| middle         |                                |
| Upper          |                                |

| Contents                                             |                                                |
|------------------------------------------------------|------------------------------------------------|
| (1) Learning agricultural knowledge                  | (5) Crop processing (jam, noodle making, etc.) |
| (2) Planting experience                              | (6) Cooking Experience                         |
| (3) Cultivation Management (weeding, watering, etc.) | (7) Animal Feeding experience                  |
| (4) Harvest Experience                               | (8) Other ( )                                  |

| academic grade | Frequency<br>(Single answers) |
|----------------|-------------------------------|
| lower          |                               |
| middle         |                               |
| Upper          |                               |

| Frequency                 |                          |
|---------------------------|--------------------------|
| (1) Daily                 | (4) About once a month   |
| (2) At least twice a week | (5) Several times a year |
| (3) About once a week     | (6) Other ( )            |

Q5 Who are the implementers and supporters of the agricultural experience in the school?

For each category (1-7), please select all applicable numbers from the following support activities and enter them in the space provided in the table.

| supporter                                                               | Support Activity |
|-------------------------------------------------------------------------|------------------|
| 1. School teachers                                                      |                  |
| 2. Parents                                                              |                  |
| 3. neighboring farmers                                                  |                  |
| 4.neighboring residents                                                 |                  |
| 5. Japan Agricultural Cooperatives and other agricultural organizations |                  |
| 6. agriculture-related companies                                        |                  |
| 7. Other ( )                                                            |                  |

Support Activities.:

- (1) Daily cultivation management of agricultural products
- (2) Provision of knowledge about agriculture and agricultural products (including

participation in classes)

- (3) Cultivation management of agricultural products
- (4) Support for agricultural experience
- (5) Provision of seedlings
- (6) Provision of agricultural materials
- (7) Others
- (8) Nothing in particular

Q6 What do you think of the advantages of conducting agricultural experiences in the school? Please put a "○" in all applicable numbers.

- |                                                                                                                                                                                                                                                                                                                                                                                                                                                                                                                                                                                                                                                        |
|--------------------------------------------------------------------------------------------------------------------------------------------------------------------------------------------------------------------------------------------------------------------------------------------------------------------------------------------------------------------------------------------------------------------------------------------------------------------------------------------------------------------------------------------------------------------------------------------------------------------------------------------------------|
| <ul style="list-style-type: none"><li>1. children can see farm products on a daily basis</li><li>2. AEs can be done frequently</li><li>3. Children can be cared for at all times during the agricultural experiences</li><li>4. It is safe because no movement and no suspicious people5. be able to teach in relation to classroom learning.</li><li>5. Can teach agriculture knowledge in the classroom.</li><li>6. The growth of agricultural product can be continuously observed</li><li>7. Connection to food education is available</li><li>8. Partnerships with local farmers</li><li>9. other ( )</li><li>10. nothing in particular</li></ul> |
|--------------------------------------------------------------------------------------------------------------------------------------------------------------------------------------------------------------------------------------------------------------------------------------------------------------------------------------------------------------------------------------------------------------------------------------------------------------------------------------------------------------------------------------------------------------------------------------------------------------------------------------------------------|

Q7 What do you think of the disadvantages of conducting agricultural experiences in the school? Please put a "○" in all applicable numbers.

- |                                                                                                                                                                                                                                                                                                                                                                                                                                                                                                                                                                                        |
|----------------------------------------------------------------------------------------------------------------------------------------------------------------------------------------------------------------------------------------------------------------------------------------------------------------------------------------------------------------------------------------------------------------------------------------------------------------------------------------------------------------------------------------------------------------------------------------|
| <ul style="list-style-type: none"><li>1. The spaces for growing agricultural products are limited</li><li>2. Poor growing environment for crops, such as shaded by school</li><li>3. School teachers have difficulty carving out time for produce management</li><li>4. Students have difficulty carving out time for produce management</li><li>5. Lack of faculty with agricultural knowledge and skills</li><li>6. Limited types of AEs that can be performed</li><li>7. Time spent on each experience is too short</li><li>8. other ( )</li><li>9. nothing in particular</li></ul> |
|----------------------------------------------------------------------------------------------------------------------------------------------------------------------------------------------------------------------------------------------------------------------------------------------------------------------------------------------------------------------------------------------------------------------------------------------------------------------------------------------------------------------------------------------------------------------------------------|

## Part II Agriculture experiences near the school.

Q8 Please provide as much information as you can about the school farms near the school.

|                                      |                          |
|--------------------------------------|--------------------------|
| Name of school farm: ( )             |                          |
| Location: ( )                        |                          |
| Distance from school: Walking ( min) | Area: ( m <sup>2</sup> ) |

Q9 What kind of agricultural products are grown at the facilities? Please put a "○" in all applicable numbers.

|                                                             |
|-------------------------------------------------------------|
| 1. Root crops (radishes, carrots, etc.)                     |
| 2. Fruit vegetables (tomatoes, eggplants, etc.)             |
| 3. Leafy vegetables (lettuce, etc.)                         |
| 4. Cereals (rice, beans, etc.)                              |
| 5. Herbs (shiso, basil, etc.)                               |
| 6. Fruit trees (plum, pear, etc.)                           |
| 7. Trees whose leaves are used (e.g., tea)                  |
| 8. Livestock (animals such as rabbits, sheep, and chickens) |
| 9. Other ( )                                                |

Q10 What facilities do you have for agricultural experience in the school farm near the school? Please put a "○" in all applicable numbers.

|                                                                                                                  |
|------------------------------------------------------------------------------------------------------------------|
| 1. orchard 2. paddy field (approx. m <sup>2</sup> ) 3. field (approx. m <sup>2</sup> ) 4. flowerbed 5. flowerpot |
| 6. Livestock Shelters 7. Agricultural product shop 8. Vertical greening 9. other ( )                             |

Q11 What is the content of agricultural experience conducted in the facilities in each academic grade? What is the frequency of agricultural experiences? Please check all applicable numbers in the table on the right. Please check all applicable figures in the right table and fill them in the left table by grade.

※Lower grades (1st and 2nd grade) Middle grades (3rd and 4th grade) Upper grades (5th and 6th grade)

| academic grade | Contents<br>(Multiple answers) |   | Contents                                             |                                                |
|----------------|--------------------------------|---|------------------------------------------------------|------------------------------------------------|
| lower          |                                | ← | (1) Learning agricultural knowledge                  | (5) Crop processing (jam, noodle making, etc.) |
| middle         |                                |   | (2) Planting experience                              | (6) Cooking Experience                         |
| Upper          |                                |   | (3) Cultivation Management (weeding, watering, etc.) | (7) Animal feeding experience                  |
|                |                                |   | (4) Harvest Experience                               | (8) Other ( )                                  |

| academic grade | Frequency<br>(Single answers) |   | Frequency                 |                          |
|----------------|-------------------------------|---|---------------------------|--------------------------|
| lower          |                               | ← | (1) Daily                 | (4) About once a month   |
| middle         |                               |   | (2) At least twice a week | (5) Several times a year |
| Upper          |                               |   | (3) About once a week     | (6) Other ( )            |
|                |                               |   |                           |                          |

Q12 Who are the implementers and supporters of the agricultural experience in the school farm near the school?

For each category (1-7), please select all applicable numbers from the following support activities and enter them in the space provided in the table.

| supporter                                                               | Support Activity |
|-------------------------------------------------------------------------|------------------|
| 1. School teachers                                                      |                  |
| 2. Parents                                                              |                  |
| 3. neighboring farmers                                                  |                  |
| 4.neighboring residents                                                 |                  |
| 5. Japan Agricultural Cooperatives and other agricultural organizations |                  |
| 6. Agricultural companies                                               |                  |
| 7. Other ( )                                                            |                  |

Support Activities.:

- (1) Daily cultivation management of agricultural products
- (2) Provision of knowledge about agriculture and agricultural products (including participation in classes)
- (3) Cultivation management of agricultural products
- (4) Support for agricultural experience
- (5) Provision of seedlings
- (6) Provision of agricultural materials
- (7) Others

(8) Nothing in particular

Q13 What do you think of the advantages of conducting agricultural experiences in the school farm near the school? Please put a "○" in all applicable numbers.

1. children can see farm products on a daily basis
2. Many types of AEs that can be conducted
3. The growth of agricultural product can be continuously observed
4. Farmland acreage can be secured.
5. Children are easily surrounded by agricultural landscapes and natural environment
6. Knowledge classes and support can be obtained from farmers
7. Connection to food education is available
8. Partnerships with local farmers
9. other (                      )
10. nothing in particular

Q14 What do you think of the disadvantages of conducting agricultural experiences in the school farm near the school? Please put a "○" in all applicable numbers.

1. Concerns about safety issues such as traffic accidents during transportation
2. It takes time to move to the school farm.
3. School teachers have difficulty carving out time for produce management
4. Students have difficulty carving out time for produce management
5. Frequency of AEs depends on the weather.
6. Costly for AEs.
7. No knowledge classes or support from farmers
8. other (                      )
9. nothing in particular

## Part III Agriculture experiences in remote parks and agricultural experience facilities away from schools.

Q15 Please provide as much information as you can about the school farms that in remote parks and agricultural experience facilities away from schools.

|                                                                               |                 |
|-------------------------------------------------------------------------------|-----------------|
| Name of park/agricultural experience facility: (                              | )               |
| Distance from school: (Transportation method:                                 | ) in ( minutes) |
| ※ Example: Transportation: 60 minutes by bus                                  |                 |
| Overnight stay: Yes (for night) • No Please put a "○" in the appropriate box. |                 |

Q16 What facilities do you have for agricultural experience in the school farm that in remote parks and agricultural experience facilities away from schools? Please put a "○" in all applicable numbers.

|                                                                                  |                                   |                             |
|----------------------------------------------------------------------------------|-----------------------------------|-----------------------------|
| 1. Flowerbed ( m <sup>2</sup> )                                                  | 2. Paddy field ( m <sup>2</sup> ) | 3. Field ( m <sup>2</sup> ) |
| 4. Flowerpot                                                                     | 5. Vertical greening              | 6. Livestock Shelters       |
| 7. agricultural processing experience hall                                       |                                   |                             |
| 8. agricultural exhibition hall (display of agricultural tools, specimens, etc.) |                                   |                             |
| 9. Agricultural product shop 10. other ( )                                       |                                   |                             |

Q17 What kind of agricultural products are grown at the facilities? Please put a "○" in all applicable numbers.

|                                                             |
|-------------------------------------------------------------|
| 1. Root vegetables (radishes, carrots, etc.)                |
| 2. Fruit vegetables (tomatoes, eggplants, etc.)             |
| 3. Leafy vegetables (lettuce, etc.)                         |
| 4. Cereals (rice, beans, etc.)                              |
| 5. Herbs (shiso, basil, etc.)                               |
| 6. Fruit trees (plum, pear, etc.)                           |
| 7. Trees whose leaves are used (e.g., tea)                  |
| 8. Livestock (animals such as rabbits, sheep, and chickens) |
| 9. Other ( )                                                |

Q18 What is the content of agricultural experience conducted in the facilities in each academic grade? What is the frequency of agricultural experiences? Please check all applicable numbers in the table on the right. Please check all applicable figures in the right table and fill them in the left table by grade.

※Lower grades (1st and 2nd grade) Middle grades (3rd and 4th grade) Upper egrades (5th and 6th grade)

| academic grade | Contents<br>(Multiple answers) |
|----------------|--------------------------------|
| lower          |                                |
| middle         |                                |
| Upper          |                                |

| Contents                                             |                                                |
|------------------------------------------------------|------------------------------------------------|
| (1) Learning agricultural knowledge                  | (5) Crop processing (jam, noodle making, etc.) |
| (2) Planting experience                              | (6) Cooking Experience                         |
| (3) Cultivation Management (weeding, watering, etc.) | (7)Animal feeding experience                   |
| (4) Harvest Experience                               | (8) Other ( )                                  |

| academic grade | Frequency<br>(Single answers) |
|----------------|-------------------------------|
| lower          |                               |
| middle         |                               |
| Upper          |                               |

| Frequency                 |                          |
|---------------------------|--------------------------|
| (1) Daily                 | (4) About once a month   |
| (2) At least twice a week | (5) Several times a year |
| (3) About once a week     | (6) Other ( )            |

Q19 Who are the implementers and supporters of the agricultural experience in the school farms that in remote parks and agricultural experience facilities away from schools?

For each category (1-7), please select all applicable numbers from the following support activities and enter them in the space provided in the table.

| supporter                                                               | Support Activity |
|-------------------------------------------------------------------------|------------------|
| 1. School teachers                                                      |                  |
| 2. Parents                                                              |                  |
| 3. neighboring farmers                                                  |                  |
| 4.neighboring residents                                                 |                  |
| 5. Japan Agricultural Cooperatives and other agricultural organizations |                  |
| 6. Agricultural companies                                               |                  |
| 7. Other ( )                                                            |                  |

Support Activities.:

- (1) Daily cultivation management of agricultural products
- (2) Provision of knowledge about agriculture and agricultural products (including participation in classes)
- (3) Cultivation management of agricultural products
- (4) Support for agricultural experience
- (5) Provision of seedlings

(6) Provision of agricultural materials

(7) Others

Q20: What do you think of the advantages of conducting agricultural experiences in the school farms that in remote parks and agricultural experience facilities away from schools? Please put a "○" in all applicable numbers.

1. many types of hands-on food and agriculture activities that can be conducted each time
2. the amount of hands-on work per child can be secured
3. farmers provide cultivation knowledge, technical guidance and support
4. agricultural processing and viewing experiences other than cultivation and harvesting
5. easy for children to be surrounded by agricultural landscape and natural environment
6. there is a connection to eating (school lunch)
7. there is a linkage with local agricultural resources
8. other (            )
9. nothing in particular

Q21 What do you think of the disadvantages of conducting agricultural experiences in the school farms that in remote parks and agricultural experience facilities away from schools? Please put a "○" in all applicable numbers.

1. concern about safety issues such as traffic accidents during transportation
2. travel takes time.
3. difficulty in devoting the time and effort of teachers to manage the cultivation of crops
4. difficulty in devoting the time and effort of students to manage the cultivation of crops
5. frequency of experience depends on the weather
6. the experience costs money.
7. children cannot see farm products on a daily basis
8. other (            )
9. nothing in particular

## IV. Evaluation of Agricultural Experiences on School Farms

Q22 What do you think of the agricultural experience on school farms?

Please put a "○" in the appropriate number for each of the following.

|                                                     | strongly<br>disagree | disag<br>ree | neither<br>agree nor<br>disagree | agree | strongly<br>agree |
|-----------------------------------------------------|----------------------|--------------|----------------------------------|-------|-------------------|
| Opportunities for AEs                               | 1                    | 2            | 3                                | 4     | 5                 |
| Time for each AEs                                   | 1                    | 2            | 3                                | 4     | 5                 |
| Plenty of places to experience                      | 1                    | 2            | 3                                | 4     | 5                 |
| Ensure safety                                       | 1                    | 2            | 3                                | 4     | 5                 |
| Adequate tools and equipment are available          | 1                    | 2            | 3                                | 4     | 5                 |
| Budget is adequate                                  | 1                    | 2            | 3                                | 4     | 5                 |
| The content of the AEs is sufficient.               | 1                    | 2            | 3                                | 4     | 5                 |
| variety of agricultural and livestock products      | 1                    | 2            | 3                                | 4     | 5                 |
| Supporting systems for schools are adequate         | 1                    | 2            | 3                                | 4     | 5                 |
| The effect of AEs is sufficient for children        | 1                    | 2            | 3                                | 4     | 5                 |
| Understanding of the importance of AEs for children | 1                    | 2            | 3                                | 4     | 5                 |
| Deepened the connection with parents                | 1                    | 2            | 3                                | 4     | 5                 |
| Deepened the connection with community              | 1                    | 2            | 3                                | 4     | 5                 |
| Deepened the cooperation with local agricultural    | 1                    | 2            | 3                                | 4     | 5                 |
| Other ( )                                           | 1                    | 2            | 3                                | 4     | 5                 |

Q23 What are your thoughts on the promotion of agricultural experiences on school farms?

Please put a "○" in all applicable numbers.

1. promote at the school farm in school ground
2. promote at the school farm near the school
3. promote at the school farm in remote parks and agricultural experience facilities
4. Maintain current initiatives
5. Reduce current initiatives
6. nothing in particular
7. Other ( )

Q24 What measures are needed to increase the effectiveness of the agricultural experience?

Please put a "○" in all applicable numbers.

1. Ensure partnerships with local farmers
2. Enhance the content of the agricultural experience
3. Ensure the use of harvested agricultural products
4. securing financial support
5. securing off-school farms
6. Ensuring time for agricultural experience
7. Ensuring agricultural knowledge of teachers
8. Ensuring exchange between schools implementing school farms
9. recording of experiences in text, photographs, etc.
10. internet use (e.g., SNS advertising, etc.)
11. Connection from experience to eating
12. Promote the establishment of school farms
13. promote the use of agricultural parks and agricultural park facilities
14. other ( )
15. nothing in particular

Q25 In the midst of the COVID19, please to describe in the description box your opinions and issues related to the operation of agricultural experience.

Description field:
